# Supplementary material
Source: PubMed Central journal article supplement (PMC3800465)
Supplement: NIHMS509880-supplement-2.pdf [file NIHMS509880-supplement-2.pdf]

**Bisulfite Sequencing Primers**

| <b>Primer</b> | <b>Sequence (5'-3')</b>     |
|---------------|-----------------------------|
| BS.GzmB.Fwd   | TTGTTAGTAAAGGTTAGATGTGGGT   |
| BS.GzmB.Rev   | TCTACCCTCCTACTACTAATAACAAC  |
| BS.GzmK.Fwd   | GGGGTATGGGATATTTATATTTTGAAG |
| BS.GzmK.Rev   | CTATCCTTCTCCATCACAAATCCATCC |
| BS.Itgae.Fwd  | AATATGGTTGGGGATTGATTTTATGAG |
| BS.Itgae.Rev  | CCACTTCATAACTAAAACAAATACAAC |
| BS.Ccr7.Fwd   | GAGGTGGTTTAGTAGTTAATAGAGA   |
| BS.Ccr7.Rev   | AAACATATACCACCATACCTAACCT   |

**ENCODE Data**

| <b>Tissue</b> | <b>Antibody</b> | <b>DCC_Accession</b> | <b>Resource Provider Lab</b> | <b>Institution</b> |
|---------------|-----------------|----------------------|------------------------------|--------------------|
| Thymus        | H3K4me1         | wgEncodeEM002475     | Ren, B.                      | LICR-m             |
| Thymus        | H3K4me3         | wgEncodeEM002476     | Ren, B.                      | LICR-m             |
| Thymus        | H3K27ac         | wgEncodeEM002474     | Ren, B.                      | LICR-m             |
| Thymus        | H3K27me3        | wgEncodeEM002724     | Ren, B.                      | LICR-m             |
| Thymus        | Input           | wgEncodeEM002477     | Ren, B.                      | LICR-m             |
