# Supplementary material
Source: PubMed Central journal article supplement (PMC3800465)
Supplement: NIHMS509880-supplement-3.pdf [file NIHMS509880-supplement-3.pdf]

**Motifs Enriched in Demethylated DMRs**

| Motif Name                         | Consensus            | P-value | FDR    |
|------------------------------------|----------------------|---------|--------|
| Jun-AP1(bZIP)/K562-cJun            | GATGASTCATCN         | 1E-251  | 0      |
| AP-1(bZIP)/ThioMac-PU.1            | VTGACTCATC           | 1E-249  | 0      |
| c-Myc(HLH)/LNCAP-cMyc              | VCCACGTG             | 1E-68   | 0      |
| NF-E2(bZIP)/K562-NFE2              | GATGACTCAGCA         | 1E-28   | 0      |
| bHLHE40(HLH)/HepG2-BHLHE40         | SGKCACGTGM           | 1E-23   | 0      |
| USF1(HLH)/GM12878-Usf1             | SGTCACGTGR           | 1E-15   | 0      |
| EGR(Zf)/K562-EGR1                  | TCCGCCACGCA          | 1E-13   | 0      |
| JunD(bZIP)/K562-JunD               | ATGACGTCATCN         | 1E-12   | 0      |
| NFAT:AP1/Jurkat-NFATC1             | SARTGGAAAARTGAGTCAB  | 1E-12   | 0      |
| NFAT(RHD)/Jurkat-NFATC1            | ATTTTCCATT           | 1E-10   | 0      |
| c-Jun-CRE(bZIP)/K562-cJun          | ATGACGTCATCY         | 1E-10   | 0      |
| Max(HLH)/K562-Max                  | RCCACGTGGYYN         | 1E-08   | 0      |
| Pdx1(Homeobox)/Isllet-Pdx1         | YCATYAATCA           | 1E-08   | 0      |
| NFkB-p65-Rel(RHD)/LPS-exp          | GGAAATTC             | 1E-07   | 0      |
| Hoxb4/ES-Hoxb4(GSE34014)           | TGATTRATGGCY         | 1E-07   | 0      |
| AARE(HLH)/mES-cMyc                 | GATTGCATCA           | 1E-07   | 0      |
| Nanog(Homeobox)/mES-Nanog          | RGCCATTAAC           | 1E-06   | 0      |
| IRF4(IRF)/GM12878-IRF4             | ACTGAAACCA           | 1E-06   | 0      |
| NRF1/Promoter                      | STGCGCATGCGC         | 1E-06   | 0      |
| Egr2/Thymocytes-Egr2(GSE34254)     | NGCGTGGGCGGR         | 1E-06   | 0      |
| Sp1(Zf)/Promoter                   | GGCCCCGCCCCC         | 1E-05   | 0      |
| c-Myc/mES-cMyc                     | VVCCACGTGG           | 1E-05   | 0      |
| ATF3(bZIP)/K562-ATF3               | SGGTCACGTGAC         | 1E-05   | 0.0001 |
| HIF-1a(HLH)/MCF7-HIF1a             | TACGTGCV             | 1E-04   | 0.0002 |
| T1ISRE(IRF)/Ifnb-Exp               | ACTTTCGTTTCT         | 1E-03   | 0.0017 |
| Nur77(NR)/K562-NR4A1(GSE31363)     | TGACCTTTNCNT         | 1E-03   | 0.003  |
| MYB(HTH)/ERMYB-Myb(GSE22095)       | GGCVGTTR             | 1E-03   | 0.0035 |
| CEBP:AP1/ThioMac-CEBPb             | DRTGTTGCAA           | 1E-02   | 0.01   |
| HOXA2(Homeobox)/mES-Hoxa2          | GYCATCMATCAT         | 1E-02   | 0.0104 |
| CRE(bZIP)/Promoter                 | CSGTGACGTCAC         | 1E-02   | 0.0184 |
| X-box(HTH)/NPC-H3K4me1             | GGTTGCCATGGCAA       | 1E-02   | 0.0202 |
| GATA-IR3(Zf)/iTreg-Gata3(GSE20898) | NNNNNBAGATAWYATCTVHN | 1E-02   | 0.0244 |
| ISRE(IRF)/ThioMac-LPS-exp          | AGTTTCASSTTC         | 1E-02   | 0.025  |
| GRE/RAW264.7-GRE                   | VAGRACAKWCTGTYC      | 1E-02   | 0.0463 |
| RXR(NR/DR1)/3T3L1-RXR              | TAGGGCAAAGGTCA       | 1E-02   | 0.0465 |

**Motifs Enriched in Methylated DMRs**

| Motif Name                             | Consensus            | P-value | FDR |
|----------------------------------------|----------------------|---------|-----|
| ZFX(Zf)/mES-Zfx                        | AGGCCTRG             | 1E-283  | 0   |
| ZNF711(Zf)/SH-SY5Y-ZNF711              | AGGCCTAG             | 1E-209  | 0   |
| EBF1(EBF)/Near-E2A                     | GTCCCCWGGGGA         | 1E-137  | 0   |
| SPDEF(ETS)/VCaP-SPDEF                  | ASWTCCTGBT           | 1E-135  | 0   |
| Nkx2.5(Homeobox)/HL1-Nkx2.5.biotin     | RRSCACTYAA           | 1E-118  | 0   |
| Bcl6(Zf)/Liver-Bcl6(GSE31578)          | NNNCTTTCCAGGAAA      | 1E-114  | 0   |
| ETV1(ETS)/GIST48-ETV1                  | AACCGGAAGT           | 1E-106  | 0   |
| AP-2alpha(AP2)/Hela-AP2alpha           | ATGCCCTGAGGC         | 1E-97   | 0   |
| TATA-Box(TBP)/Promoter                 | CCTTTTAWAGSC         | 1E-94   | 0   |
| Erra(NR)/HepG2-Erra                    | CAAAGGTCAG           | 1E-90   | 0   |
| EWS:FLI1-fusion(ETS)/SK_N_MC-EWS:FLI1  | VACAGGAAAT           | 1E-87   | 0   |
| GABPA(ETS)/Jurkat-GABPa                | RACCGGAAGT           | 1E-83   | 0   |
| ZNF143 STAF(Zf)/CUTLL-ZNF143(GSE29600) | ATTTCCCAGVAKSCY      | 1E-82   | 0   |
| ELF1(ETS)/Jurkat-ELF1                  | AVCCGGAAGT           | 1E-78   | 0   |
| AP2gamma(AP2)/MCF7-TFAP2c              | HHTGSCCTSAGGSCA      | 1E-78   | 0   |
| E2A-nearPU.1(HLH)/Bcell-PU.1           | NVCACCTGBN           | 1E-77   | 0   |
| ERG(ETS)/VCaP-ERG                      | ACAGGAAGTG           | 1E-71   | 0   |
| FOXA1:AR/LNCAP-AR                      | AGTAAACAAAAAGAACAND  | 1E-70   | 0   |
| PRDM14(Zf)/H1-PRDM14                   | RGGTCTCTAACY         | 1E-64   | 0   |
| HRE(HSF)/HepG2-HSF1                    | BSTTCTRGAABVTTCYAGAA | 1E-62   | 0   |
| FOXA1(Forkhead)/MCF7-FOXA1             | WAAGTAAACA           | 1E-62   | 0   |
| NF1(CTF)/LNCAP-NF1                     | CYTGGCABNSTGCCAR     | 1E-61   | 0   |
| E2A(HLH)/proBcell-E2A                  | DNRCAGCTGY           | 1E-61   | 0   |
| Tcf4(HMG)/Hct116-Tcf4                  | ASATCAAAGGVA         | 1E-60   | 0   |
| EWS:ERG-fusion(ETS)/CADO_ES1-EWS:ERG   | ATTTCCCTGTN          | 1E-54   | 0   |

|                                      |                      |       |   |
|--------------------------------------|----------------------|-------|---|
| Nr5a2(NR)/mES-Nr5a2                  | BTCAAGGTCA           | 1E-54 | 0 |
| Tcf3(HMG)/mES-Tcf3                   | ASWTCAAAGG           | 1E-53 | 0 |
| Unknown/Homeobox/Limb-p300           | SSCMATWAAA           | 1E-52 | 0 |
| BORIS(Zf)/K562-CTCF                  | CNNBRGCGCCCCCTGSTGCC | 1E-52 | 0 |
| FOXA1(Forkhead)/LNCAP-FOXA1          | WAAGTAAACA           | 1E-51 | 0 |
| HNF4a(NR/DR1)/HepG2-HNF4a            | CARRGKBCAAAGTYCA     | 1E-48 | 0 |
| ETS(ETS)/Promoter                    | AACCGGAAGT           | 1E-47 | 0 |
| Smad3(MAD)/NPC-Smad3(GSE36673)       | TWGTCTGV             | 1E-46 | 0 |
| ETS1(ETS)/Jurkat-ETS1                | ACAGGAAGTG           | 1E-45 | 0 |
| Ets1-distal(ETS)/CD4+-PolII          | MACAGGAAGT           | 1E-44 | 0 |
| AR-halfsite(NR)/LNCaP-AR             | CCAGGAACAG           | 1E-41 | 0 |
| Nr5a2(NR)/Pancreas-LRH1(GSE34295)    | BTCAAGGTCA           | 1E-37 | 0 |
| CRX(Homeobox)/Retina-Crx             | GCTAATCC             | 1E-36 | 0 |
| Tcf12(HLH)/GM12878-Tcf12             | VCAGCTGYTG           | 1E-33 | 0 |
| SEP3(MADS)/Arabidopsis-Flower-Sep3   | CCAAAAAGGG           | 1E-33 | 0 |
| RARg(NR)/ES-RARg(GSE30538)           | AGGTCAAGGTCA         | 1E-30 | 0 |
| EBF(EBF)/proBcell-EBF                | DGTCCCYRGGGA         | 1E-29 | 0 |
| CTCF(Zf)/CD4+-CTCF                   | AYAGTGCCMYCTRGTGGCCA | 1E-29 | 0 |
| CHR/Cell-Cycle-Exp                   | SRGTTTCAA            | 1E-27 | 0 |
| Stat3+il23(Stat)/CD4-Stat3           | SVYTTCCNGGAARB       | 1E-26 | 0 |
| Gfi1b(Zf)/HPC7-Gfi1b                 | MAATCACTGC           | 1E-24 | 0 |
| PU.1(ETS)/ThioMac-PU.1               | AGAGGAAGTG           | 1E-24 | 0 |
| HEB?/mES-Nanog                       | CACAGCAGGGGG         | 1E-24 | 0 |
| Atoh1(bHLH)/Cerebellum-Atoh1         | VNRVCAGCTGGY         | 1E-21 | 0 |
| Stat3(Stat)/mES-Stat3                | CTTCCGGGAA           | 1E-20 | 0 |
| Sox3(HMG)/NPC-Sox3(GSE33059)         | CCWTTGT              | 1E-19 | 0 |
| STAT6(Stat)/CD4-Stat6                | ABTTCYRRGAA          | 1E-18 | 0 |
| NeuroD1(bHLH)/Isl1-NeuroD1(GSE30298) | GCCATCTGTT           | 1E-17 | 0 |
| GFY-Staf/Promoters                   | RACTACAATCCAGAAKGC   | 1E-17 | 0 |
| Mef2a(MADS)/HL1-Mef2a.biotin/        | CYAAAAATAG           | 1E-16 | 0 |
| NFkB-p65(RHD)/GM12787-p65            | WGGGGATTTCCC         | 1E-16 | 0 |
| STAT1(Stat)/HelaS3-STAT1             | NATTCCNGGAAAT        | 1E-16 | 0 |
| TCFL2(HMG)/K562-TCFL2(GSE29196)      | ACWTCAAAGG           | 1E-16 | 0 |
| Olig2(bHLH)/Neuron-Olig2(GSE30882)   | RCCATMTGTT           | 1E-15 | 0 |
| MyoD(HLH)/Myotube-MyoD               | RRCAGCTGYTSY         | 1E-15 | 0 |
| Sox2(HMG)/mES-Sox2                   | BCCATTGTTT           | 1E-14 | 0 |
| ETS:RUNX/Jurkat-RUNX1                | RCAGGATGTGGT         | 1E-13 | 0 |
| FOXP1(Forkhead)/H9-FOXP1(GSE31006)   | NYYTGTTTTACHN        | 1E-13 | 0 |
| STAT4(Stat)/CD4-Stat4                | NYTTCCWGGGAAR        | 1E-13 | 0 |
| Foxo1(Forkhead)/RAW-Foxo1            | CTGTTTAC             | 1E-13 | 0 |
| Tlx?/NPC-H3K4me1                     | CTGGCAGSCTGCCA       | 1E-12 | 0 |
| STAT6/Macrophage-Stat6               | TTCKKNAGAA           | 1E-12 | 0 |
| Hoxc9/Ainv15-Hoxc9                   | GGCCATAAATCA         | 1E-11 | 0 |
| NF1-halfsite(CTF)/LNCaP-NF1          | YTGCCAAG             | 1E-10 | 0 |
| STAT5(Stat)/mCD4+-Stat5a b           | RTTTCTNAGAAA         | 1E-09 | 0 |
| ETS:E-box/HPC7-Scl                   | AGGAARCAGCTG         | 1E-09 | 0 |
| TEAD4(TEA)/Tropoblast-Tea4(GSE37350) | CCWGGAAATGY          | 1E-08 | 0 |
| VDR(NR/DR3)/GM10855-VDR+vitD         | ARAGGTCANWGAGTTCANNN | 1E-08 | 0 |
| GATA3(Zf)/iTreg-Gata3(GSE20898)      | AGATAASR             | 1E-08 | 0 |
| NRF1(NRF)/MCF7-NRF1                  | CTGCGCATGCGC         | 1E-08 | 0 |
| TR4(NR/DR1)/Hela-TR4                 | GAGGTCAAAGGTCA       | 1E-08 | 0 |
| GATA-DR8(Zf)/iTreg-Gata3(GSE20898)   | AGATSTNDNDSAGATAASN  | 1E-07 | 0 |
| HOXA9/HSC-Hoxa9(GSE33509)            | GGCCATAAATCA         | 1E-07 | 0 |
| Esrrb(NR)/mES-Esrrb                  | KTGACCTTGA           | 1E-07 | 0 |
| TEAD(TEA)/Fibroblast-PU.1            | YCWGGAAATGY          | 1E-07 | 0 |
| Cdx2(Homeobox)/mES-Cdx2              | GYMATAAAAH           | 1E-07 | 0 |
| RUNX1(Runt)/Jurkat-RUNX1             | AAACCACARM           | 1E-07 | 0 |
| Oct4(POU/Homeobox)/mES-Oct4          | ATTTGCATAW           | 1E-07 | 0 |
| EKLF(Zf)/Erythrocyte-Klf1(GSE20478)  | NWGGGTGTGGCY         | 1E-06 | 0 |
| NF1:FOXA1/LNCAP-FOXA1                | WNTGTTTTTRYTTGGCA    | 1E-06 | 0 |
| Lhx3(Homeobox)/Forebrain-p300        | CTAATTAGCH           | 1E-05 | 0 |

|                                                    |                      |       |        |
|----------------------------------------------------|----------------------|-------|--------|
| Sox6(HMG)/Myotubes-Sox6(GSE32627)                  | CCATTGTTNY           | 1E-05 | 0      |
| FXR(NR/IR1)/Liver-FXR                              | AGGTCANTGACCTB       | 1E-05 | 0      |
| ARE(NR)/LNCAP-AR                                   | RGRACASNSTGTICYB     | 1E-05 | 0      |
| OCT4-SOX2-TCF-NANOG((POU/Homeobox/HMG)/mES         | ATTTGCATAACAATG      | 1E-05 | 0      |
| Gata2(Zf)/K562-GATA2                               | BBCTTATCTS           | 1E-05 | 0      |
| Foxa2(Forkhead)/Liver-Foxa2                        | CYTGTTTACWYW         | 1E-04 | 0      |
| Tbx5(T-box)/HL1-Tbx5.biotin                        | AGGTGTCA             | 1E-04 | 0      |
| E2F(E2F)/Cell-Cycle-Exp                            | TTSGCGCGAAAA         | 1E-04 | 0      |
| Klf4(Zf)/mES-Klf4                                  | GCCACACCCA           | 1E-04 | 0      |
| Tcfcp2l1(CP2)/mES-Tcfcp2l1                         | NRAACCRGTTYRAACCRGYT | 1E-04 | 0.0001 |
| ZBTB33/GM12878-ZBTB33                              | GGVTCTCGCGAGAAC      | 1E-04 | 0.0001 |
| E2F/Hela-E2F1/Hoemr                                | CWGGCGGGAA           | 1E-03 | 0.0003 |
| GLI3(Zf)/GLI3-ChIP-Chip                            | CGTGGGTGGTCC         | 1E-03 | 0.0005 |
| GATA-DR4(Zf)/iTreg-Gata3(GSE20898)                 | AGATGKDGAGATAAG      | 1E-03 | 0.0013 |
| Gata1(Zf)/K562-GATA1                               | SAGATAAGR            | 1E-02 | 0.0019 |
| BMXB(HTH)/Hela-BMYB(GSE27030)                      | NHAACBGYYV           | 1E-02 | 0.002  |
| Oct2(POU/Homeobox)/Bcell-Oct2                      | ATATGCAAAT           | 1E-02 | 0.0021 |
| REST-NRSF(Zf)/Jurkat-NRSF                          | GGMGCTGTCCATGGTGCTGA | 1E-02 | 0.0028 |
| HNF6(Homeobox)/Liver-Hnf6(ERP000394)               | NTATYGATCH           | 1E-02 | 0.003  |
| GATA:SCL/Ter119-SCL                                | CRGCTGBNGNSNNSAGATAA | 1E-02 | 0.0078 |
| Hnf1(Homeobox)/Liver-Foxa2                         | GGTTAAWCATTAA        | 1E-02 | 0.0084 |
| Tbx20(T-box)/Heart-Tbx20(GSE29636)                 | GGTGYTGACAGS         | 1E-02 | 0.0086 |
| SCL/HPC7-Scl                                       | AVCAGCTG             | 1E-02 | 0.0107 |
| RUNX2(Runt)/PCa-RUNX2(GSE33889)                    | NWAACCACADNN         | 1E-02 | 0.012  |
| PAX3:FKHR-fusion(Paired/Homeobox)/Rh4-PAX3:FKHR    | ACCRTGACTAATTNN      | 1E-02 | 0.0134 |
| PU.1-IRF/Bcell-PU.1                                | MGGAAGTGAAAC         | 1E-01 | 0.018  |
| RFX(HTH)/K562-RFX3                                 | CGGTTGCCATGGCAAC     | 1E-01 | 0.0272 |
| RUNX(Runt)/HPC7-Runx1                              | SAAACCACAG           | 1E-01 | 0.031  |
| RUNX-AML(Runt)/CD4+-PoliI                          | GCTGTGGTTW           | 1E-01 | 0.031  |
| GFX(?)/Promoter                                    | ATTCTCGCGAGA         | 1E-01 | 0.0311 |
| Pax7-long(Paired/Homeobox)/Myoblast-Pax7(GSE25064) | TAATCHGATTAC         | 1E-01 | 0.0339 |
| Znf263(Zf)/K562-Znf263                             | CVGTSCTCCC           | 1E-01 | 0.0349 |
| GFY(?)/Promoter                                    | ACTACAATTCCC         | 1E-01 | 0.0382 |
| CARG(MADS)/PUER-Srf                                | CCATATATGGNM         | 1E-01 | 0.0382 |
| Reverb(NR/DR2)/BLRP(RAW)-Reverba                   | GTRGGTCASTGGGTCA     | 1E-01 | 0.0418 |
